# Supplementary material for: Optimized Al-doped TiO2 gate insulator for a metal-oxide-semiconductor capacitor on a Ge substrate
Source: Royal Society of Chemistry journal article supplement (doi:10.1039/d0tc04725b), 2021-01-01
Supplement: d0tc04725b1.pdf [file d0tc04725b1.pdf]

Electronic Supporting Information for

# Optimized Al-doped TiO<sub>2</sub> gate insulator for metal-oxide-semiconductor capacitor on Ge substrate

*Dong Gun Kim<sup>a</sup>, Cheol Hyun An<sup>a</sup>, Sang Hyeon Kim<sup>a</sup>, Dae Seon Kwon<sup>a</sup>, Junil Lim<sup>a</sup>, Woojin Jeon<sup>\*b</sup>,  
and Cheol Seong Hwang<sup>\*a</sup>*

<sup>a</sup>Department of Materials Science and Engineering, and Inter-University Semiconductor Research Center, Seoul National University, Seoul, 08826, Republic of Korea

<sup>b</sup>Department of Advanced Materials Engineering for Information and Electronics, Kyung Hee University, Yongin 17104, Republic of Korea

(a)

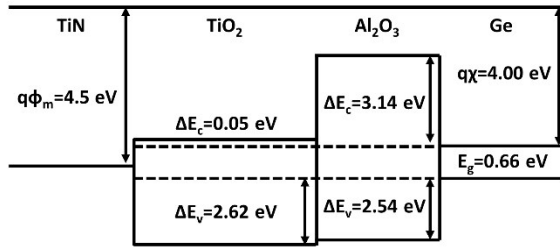

(b)

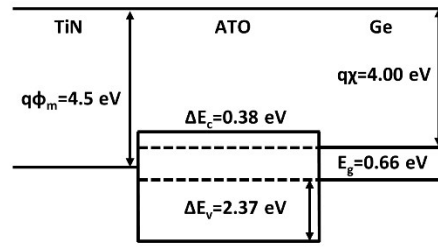

**Figure S1.** The band alignment in flat band condition of (a) Pt/TiN/TiO<sub>2</sub>/Al<sub>2</sub>O<sub>3</sub>/Ge capacitor, (b) Pt/TiN/ATO/Ge capacitor

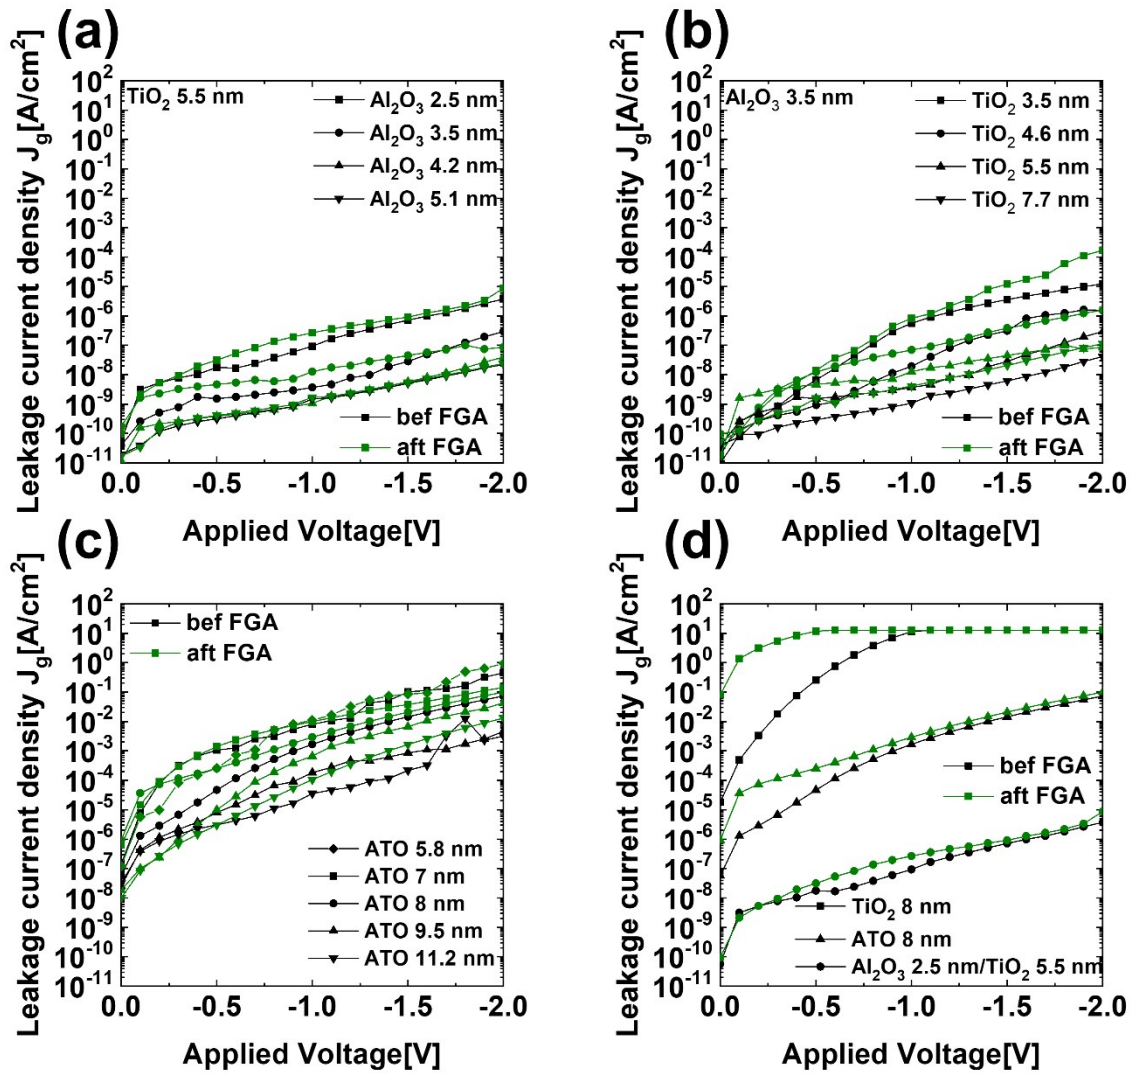

**Figure S2.** Leakage current characteristics of (a) Pt/TiN/5.5-nm-thick TiO<sub>2</sub>/2.5, 3.5, 4.2, and 5.1-nm-thick Al<sub>2</sub>O<sub>3</sub>/Ge capacitors, (b) Pt/TiN/3.5, 4.6, 5.5, and 7.7-nm-thick TiO<sub>2</sub>/3.5-nm-thick Al<sub>2</sub>O<sub>3</sub>/Ge capacitors, (c) Pt/TiN/5.8, 7, 8, 9.5, and 11.2-nm-thick ATO/Ge capacitors, (d) Pt/TiN/8-nm-thick TiO<sub>2</sub>, ATO and 5.5-nm-thick TiO<sub>2</sub>/2.5-nm-thick Al<sub>2</sub>O<sub>3</sub>/Ge capacitors before and after FGA

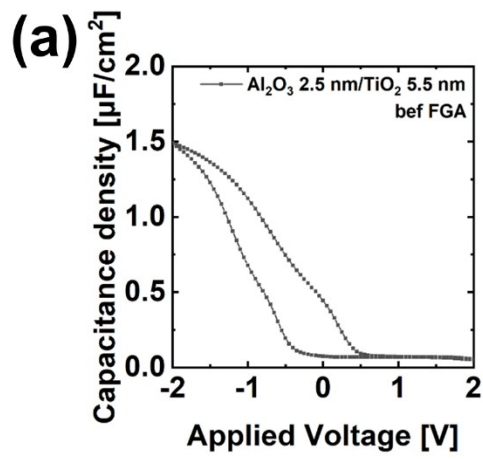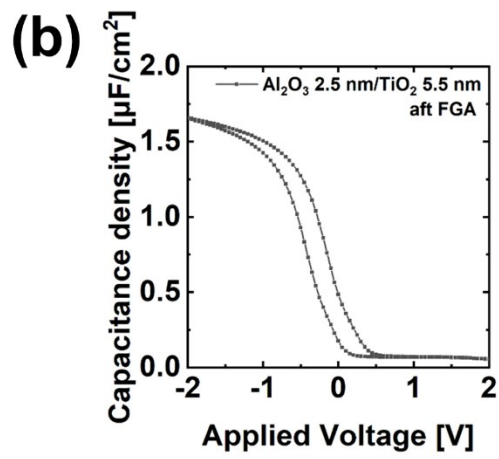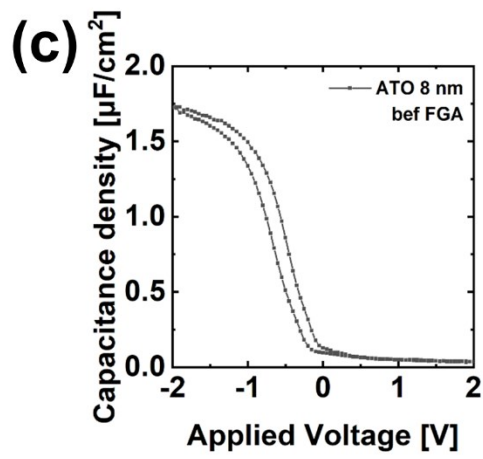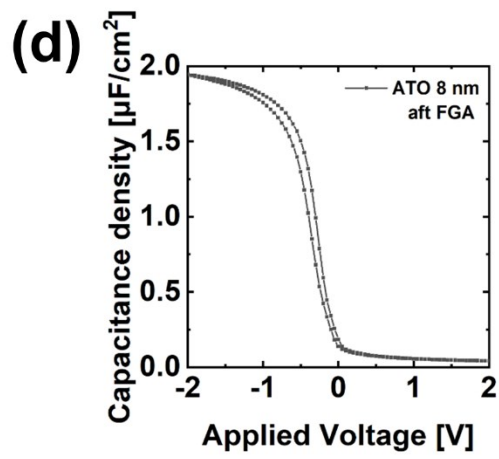

**Figure S3.** Capacitance voltage characteristics (measured at 100 kHz/130 K) of (a),(b) Pt/TiN/5.5-nm-thick  $\text{TiO}_2$ /2.5-nm-thick  $\text{Al}_2\text{O}_3$ /Ge capacitors before and after FGA (c),(d) Pt/TiN/8-nm-thick ATO/Ge capacitors before and after FGA
